# Supplementary material for: Inverse and distorted Co2SnO4 cubic spinel thin films for dimethylamine detection at room temperature
Source: Royal Society of Chemistry journal article supplement (doi:10.1039/d3nj01409f), 2023-01-01
Supplement: d3nj01409f1.pdf [file d3nj01409f1.pdf]

## Electronic Supplementary Information (ESI)

### **Inverse and distorted Co<sub>2</sub>SnO<sub>4</sub> cubic spinel thin films for dimethylamine detection at room temperature**

Santhosh Nallakumar<sup>a</sup>, Logu Thirumalaisamy<sup>b</sup>, Sridharan Madhanagurusamy<sup>c</sup>, Kalainathan Sivaperuman<sup>d</sup>, Usha Rani Muthurakku<sup>a\*</sup>

<sup>a, a\*</sup> Department of Physics, School of Advanced Sciences, VIT, Vellore, 632014, India.

<sup>b</sup> Department of Physics, G.T.N Arts College (Affiliated to Madurai Kamaraj University), Dindigul, India.

<sup>c</sup> Functional Nanomaterials & Devices Lab, Centre for Nanotechnology & Advanced Biomaterials and School of Electrical & Electronics Engineering, SASTRA Deemed to be University, Thanjavur, 613 401, India.

<sup>d</sup> Centre for Nanotechnology Research, VIT, Vellore, 632014, India

\*Authors to whom correspondence should be addressed

E-mail: [usharani.m@vit.ac.in](mailto:usharani.m@vit.ac.in)

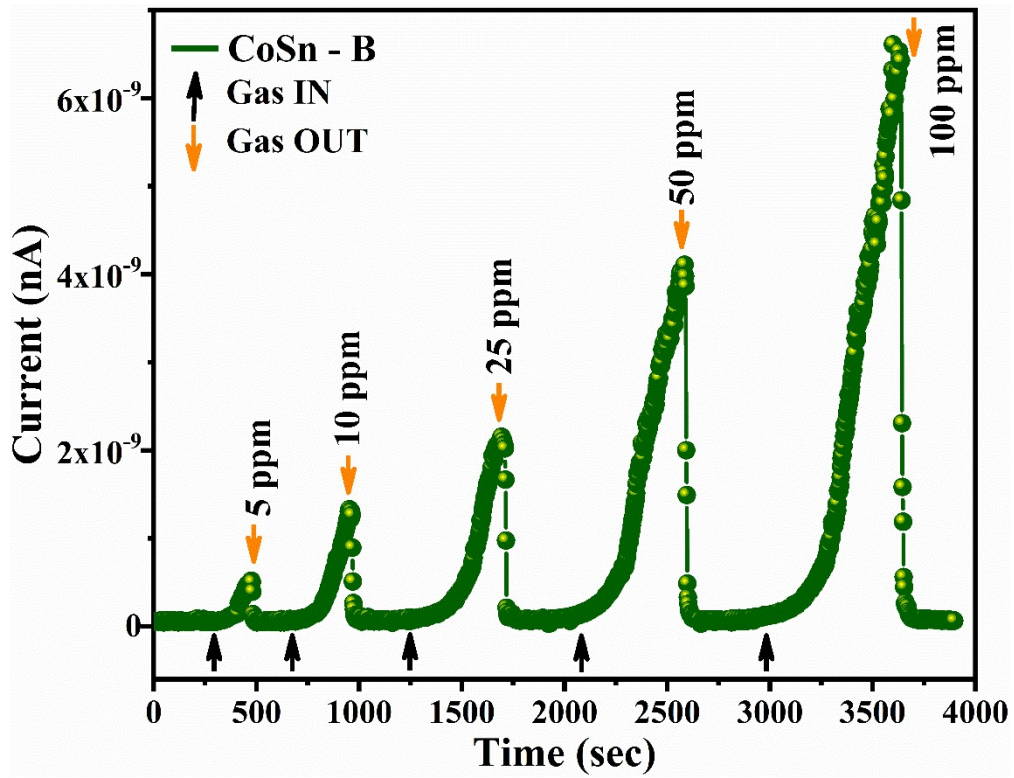

Fig. 1, Dynamic response curve for CoSn - B

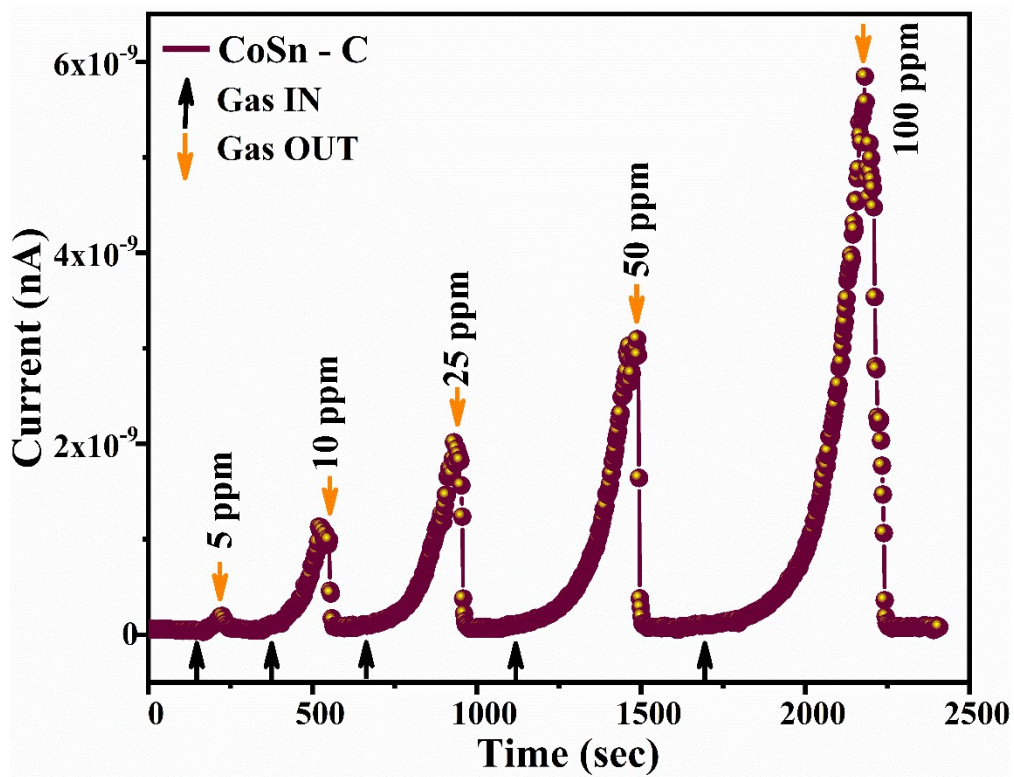

Fig. 2, Dynamic response curve for CoSn - C

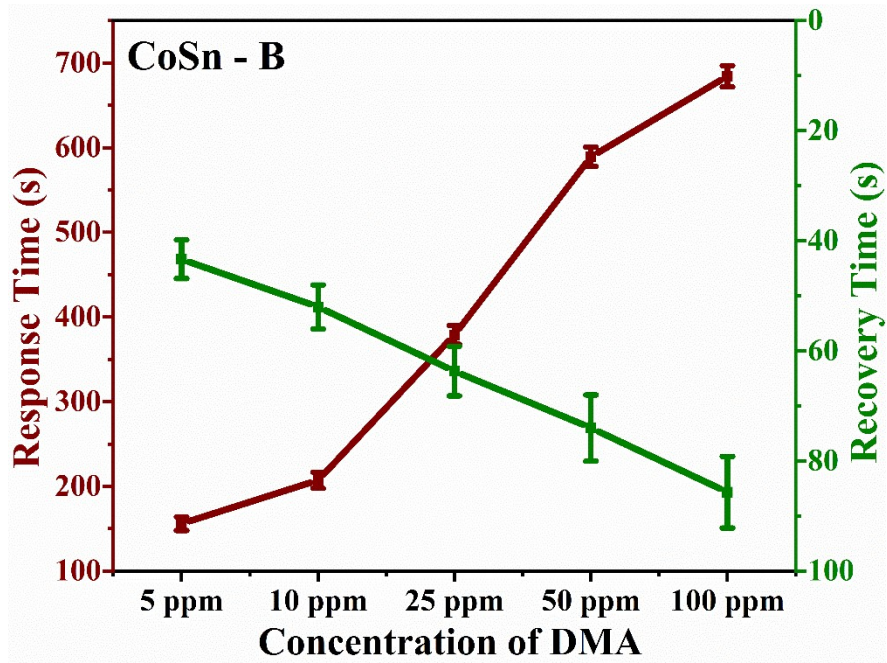

*Fig. 3(a), CoSn - B at different concentration of DMA vs response time and recovery time.*

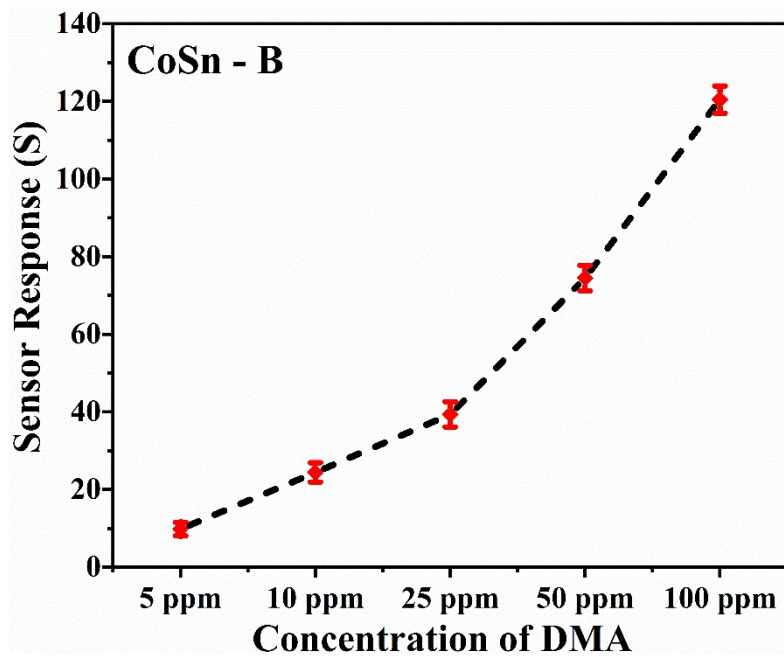

*Fig. 3(b), gas response of CoSn - B film at different concentration of DMA*

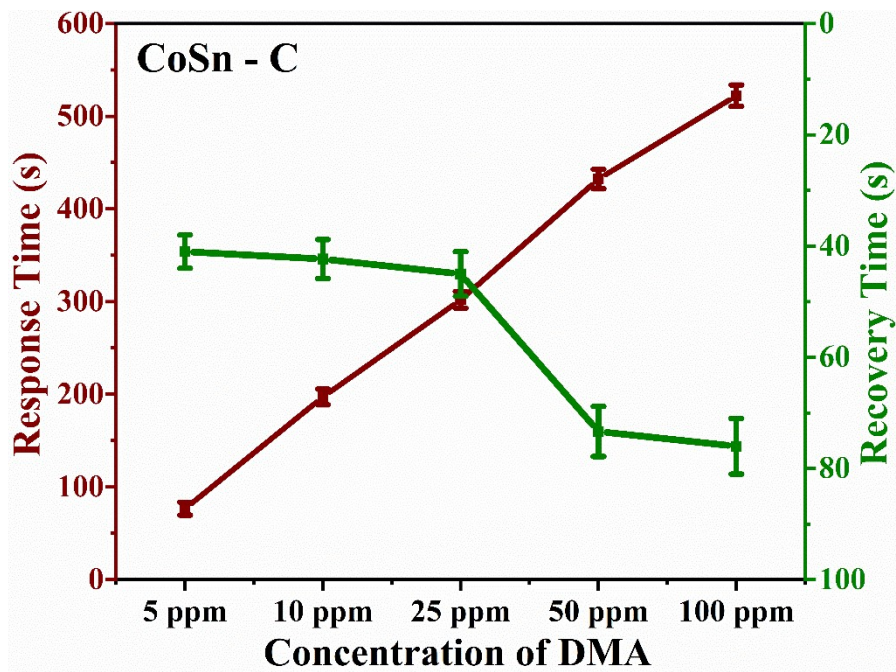

*Fig. 4(a), CoSn - C at different concentration of DMA vs response time and recovery time.*

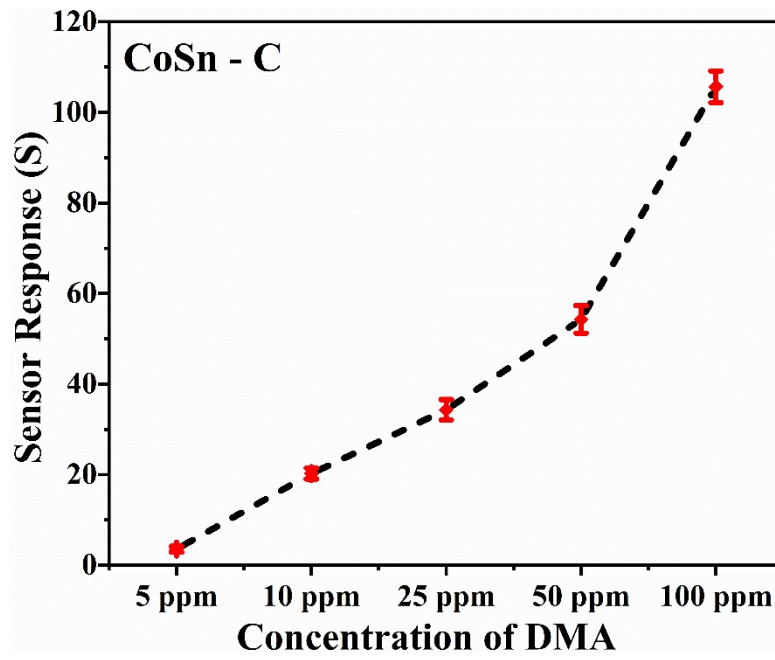

*Fig. 4(b), gas response of CoSn - C film at different concentration of DMA*
